# Supplementary material for: Hybrid films of VO2 nanoparticles and a nickel(ii)-based ligand exchange thermochromic system: excellent optical performance with a temperature responsive colour change
Source: Royal Society of Chemistry journal article supplement (doi:10.1039/c6nj03369e), 2016-12-12
Supplement: c6nj03369e1.pdf [file c6nj03369e1.pdf]

## **Electronic Supplementary Information**

### **Hybrid Film of VO<sub>2</sub> Nanoparticles and Nickel(II)-based Ligand Exchange Thermochromic System: Excellent Optical Performance with A Temperature Responsive Colour Change**

Jingting Zhu,<sup>a,b</sup> Aibin Huang,<sup>a,b</sup> Haibin Ma,<sup>a,b</sup> Yunxiang Chen,<sup>a,b</sup> Sanpei Zhang,<sup>a,b</sup> Shidong Ji,<sup>a</sup>  
Shanhu Bao<sup>a</sup> and Ping Jin<sup>a,c\*</sup>

*a. Shanghai institute of Ceramics, Chinese Academy of Sciences, Dingxi 1295, Changning, Shanghai,  
200050, China*

*b. University of Chinese Academy of Sciences, Yuquan 19, Shijingshan, Beijing, 100049, China*

*c. National Institute of Advanced Industrial Science and Technology (AIST), Moriyama, Nagoya 463-  
8560, Japan*

\* Author for correspondence. *Email: p-jin@mail.sic.ac.cn, Tel/Fax: +86-21-6990-6213*

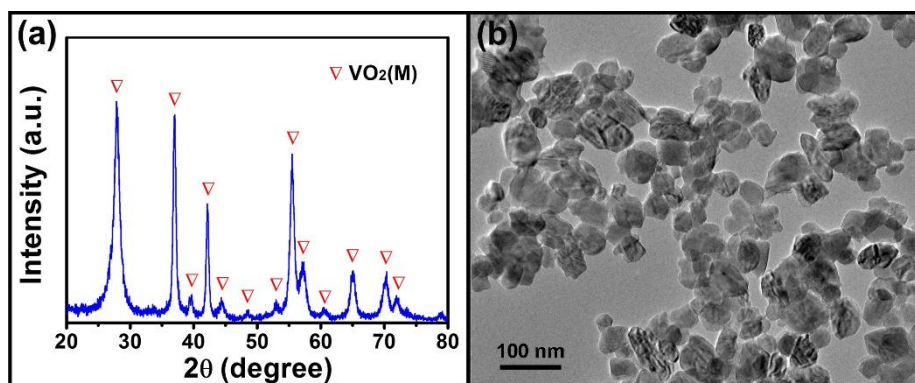

Fig. S1 (a) XRD pattern and (b) TEM image of the VO<sub>2</sub> nanoparticles we prepared.

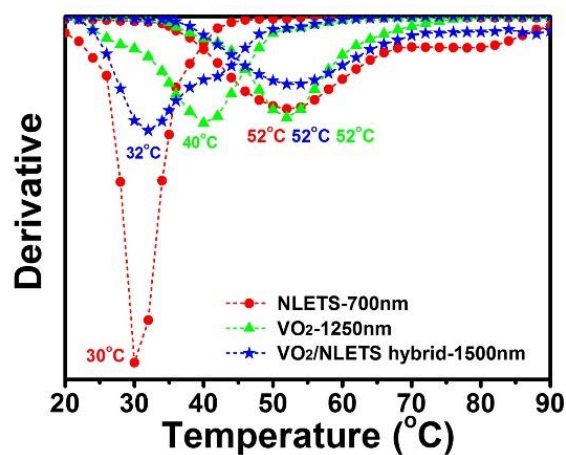

Fig. S2 A plot of  $d(\text{transmittance})/d(\text{temperature})$  versus temperature for NLETS film, VO<sub>2</sub> film and VO<sub>2</sub>/NLETS hybrid film at the wavelength of 700 nm, 1250 nm and 1500 nm respectively.

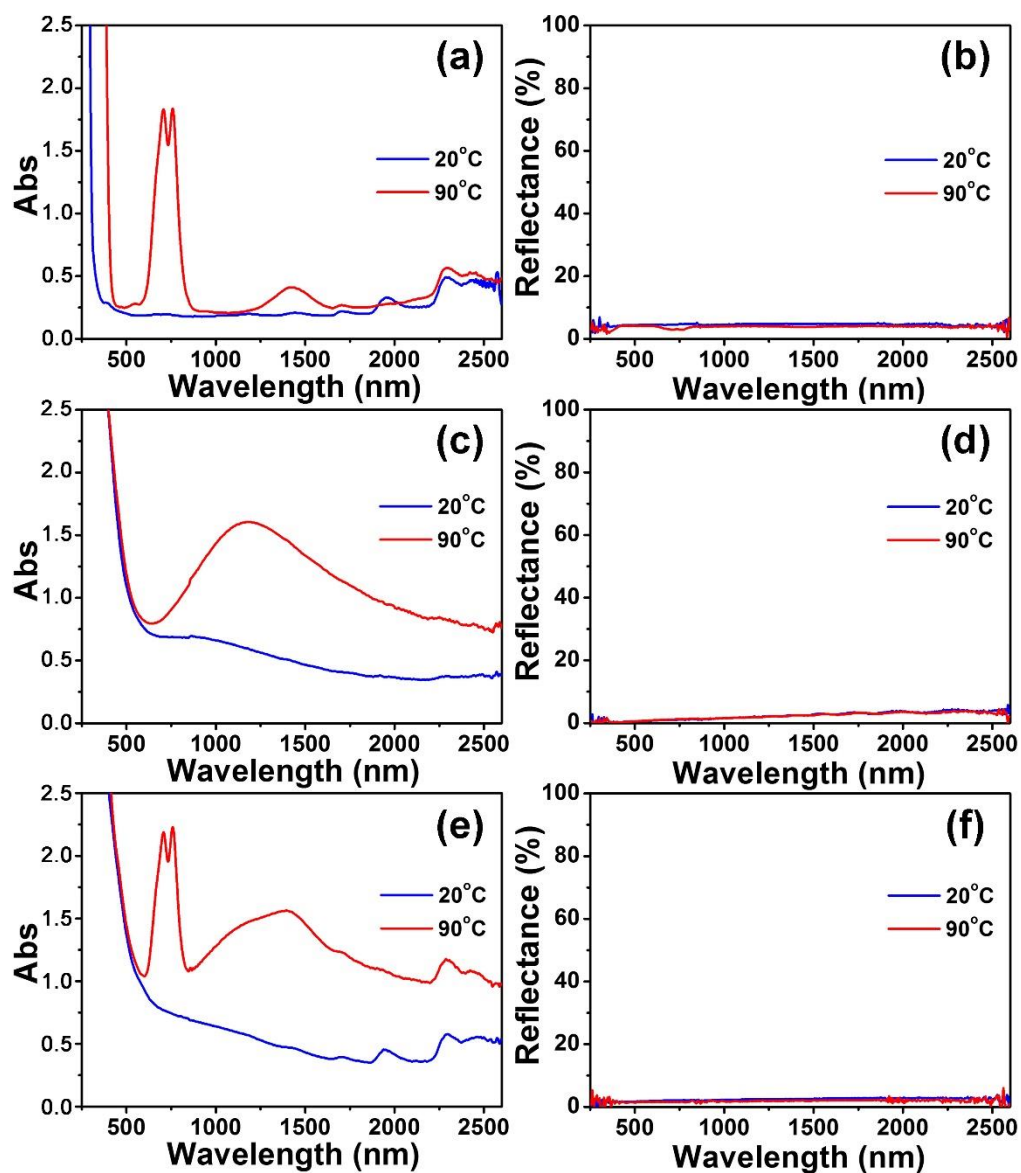

**Fig. S3** (a) Absorbance and (b) reflectance spectra of the pure NLETS film at 20 °C and 90 °C; (c) absorbance and (d) reflectance spectra of the pure VO<sub>2</sub> film at 20 °C and 90 °C; (e) absorbance and (f) reflectance spectra of the VO<sub>2</sub>/NLETS hybrid film at 20 °C and 90 °C.

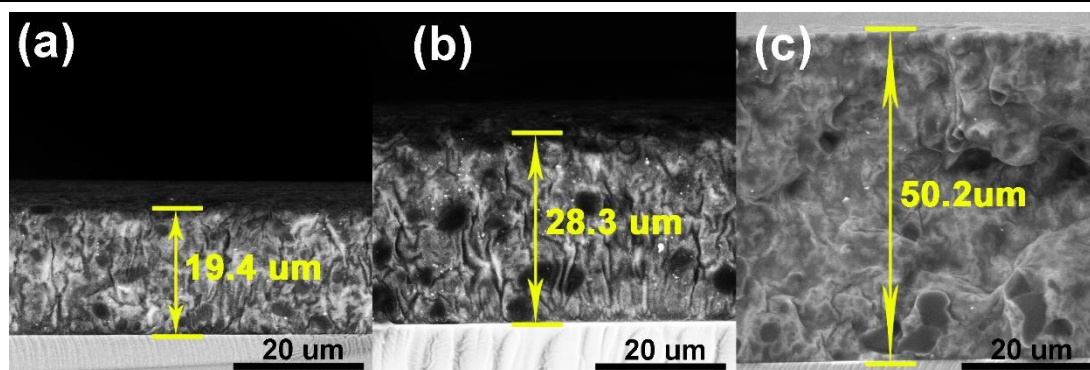

**Fig. S4** Back scattered SEM pictures of the cross-sections of VO<sub>2</sub>/NLETS hybrid films with different thicknesses: (a) around 20 μm, (b) around 30 μm and (c) around 50 μm.

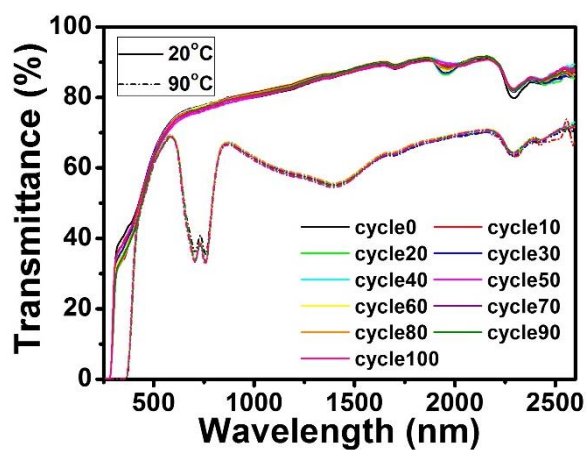

**Fig. S5** Cycle transmittance spectra of VO<sub>2</sub>/NLETS hybrid with thickness of 20 μm at 20 °C and 90 °C.
